# Supplementary material
Source: PubMed Central journal article supplement (PMC1895211)

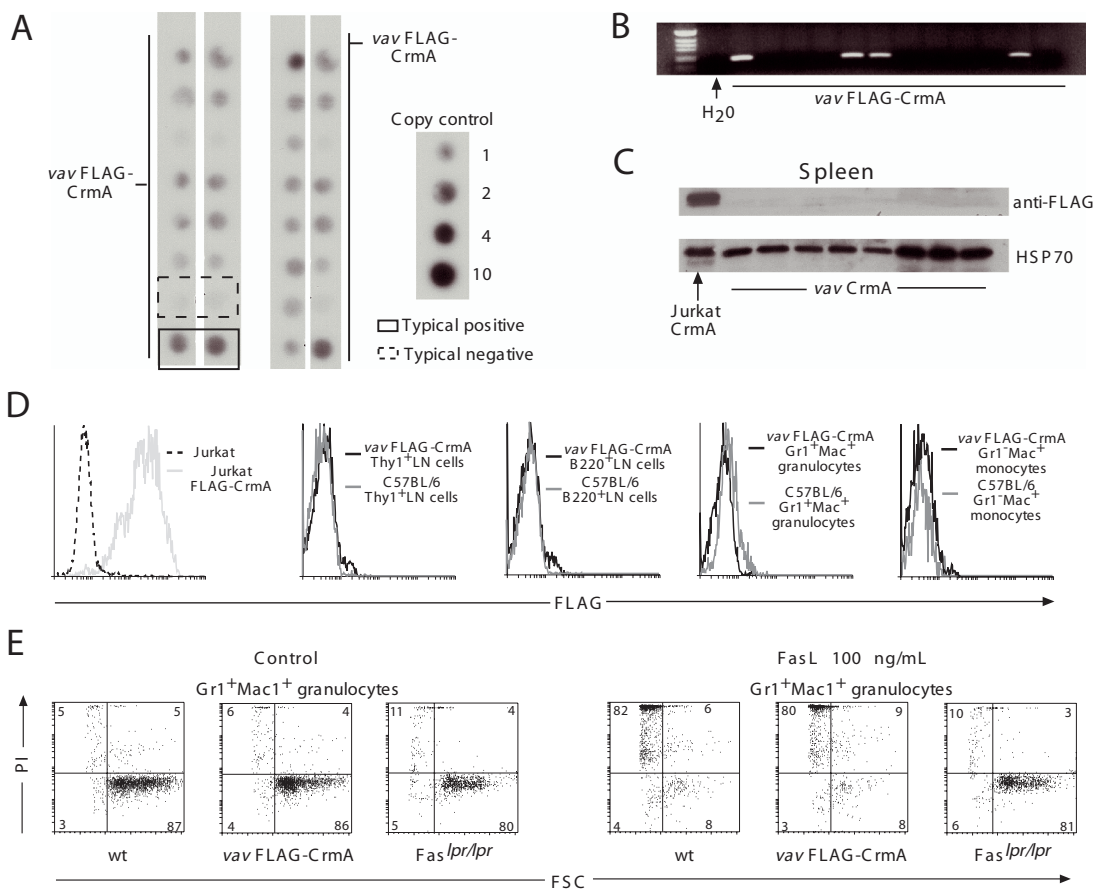

Supplement: blood_2005-01-0284_1.pdf [file blood_2005-01-0284_1.pdf]

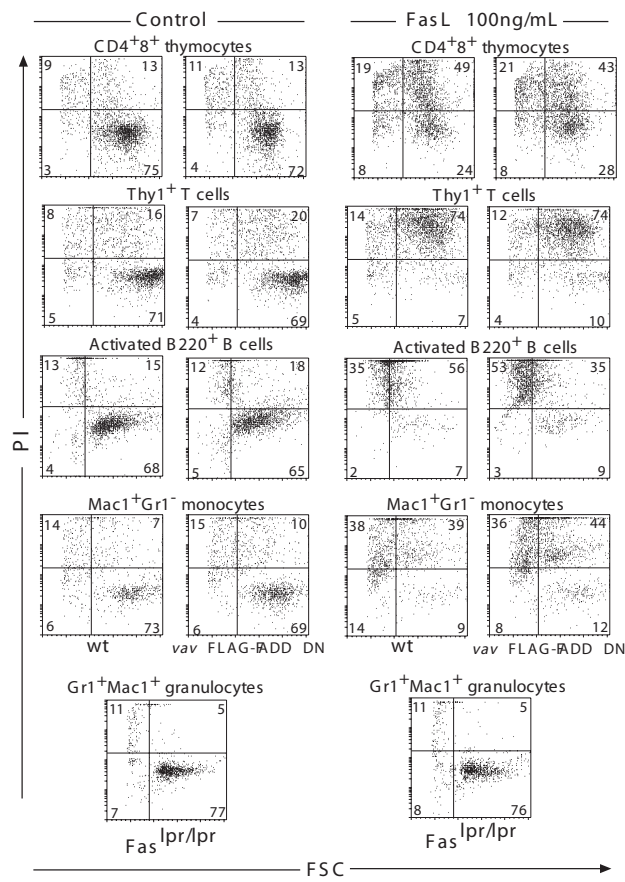

Supplement: blood_2005-01-0284_2.pdf [file blood_2005-01-0284_2.pdf]

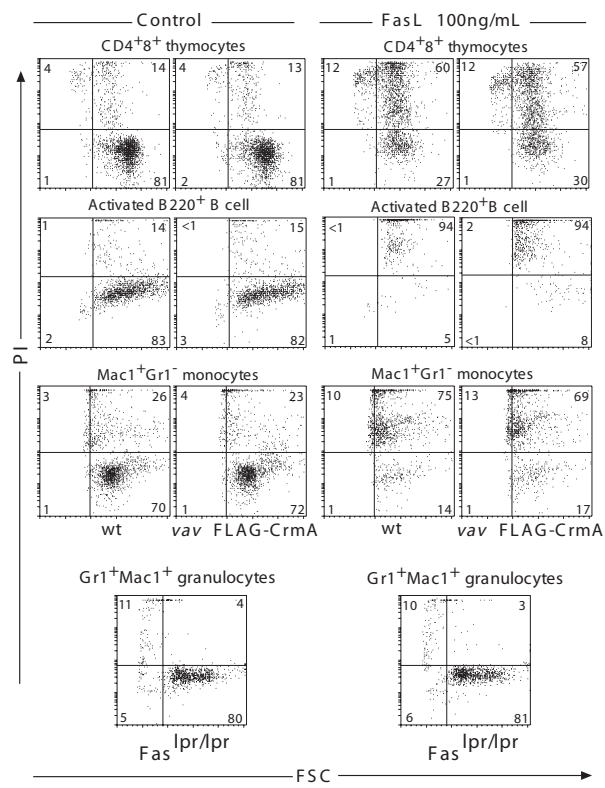

Supplement: blood_2005-01-0284_3.pdf [file blood_2005-01-0284_3.pdf]

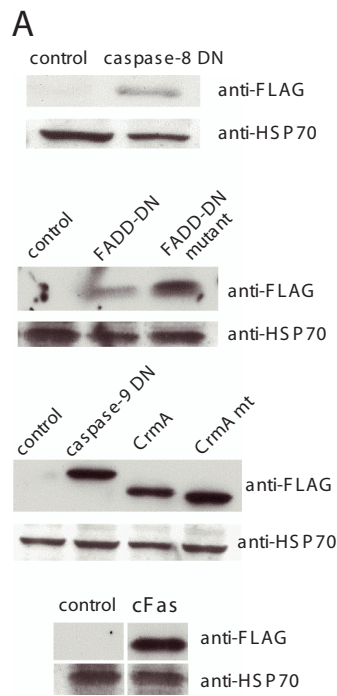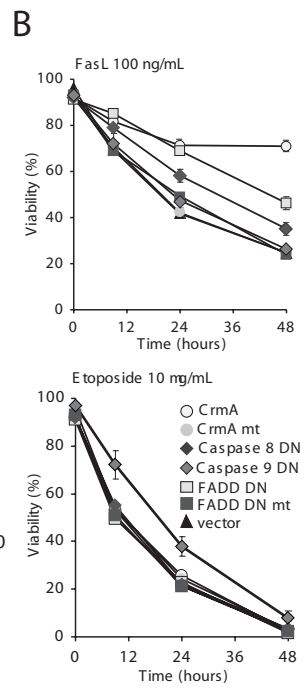

Supplement: blood_2005-01-0284_4.pdf [file blood_2005-01-0284_4.pdf]
